# Supplementary material for: Short-chain fatty acid metabolites propionate and butyrate are unique epigenetic regulatory elements linking diet, metabolism and gene expression
Source: Springer Nature journal article supplement (doi:10.1038/s42255-024-01191-9), 2025-01-09
Supplement: MOESM1 [file 42255_2024_1191_MOESM1_ESM.pdf]

# **Short-chain fatty acid metabolites propionate and butyrate are unique epigenetic regulatory elements linking diet, metabolism and gene expression**

---

In the format provided by the  
authors and unedited

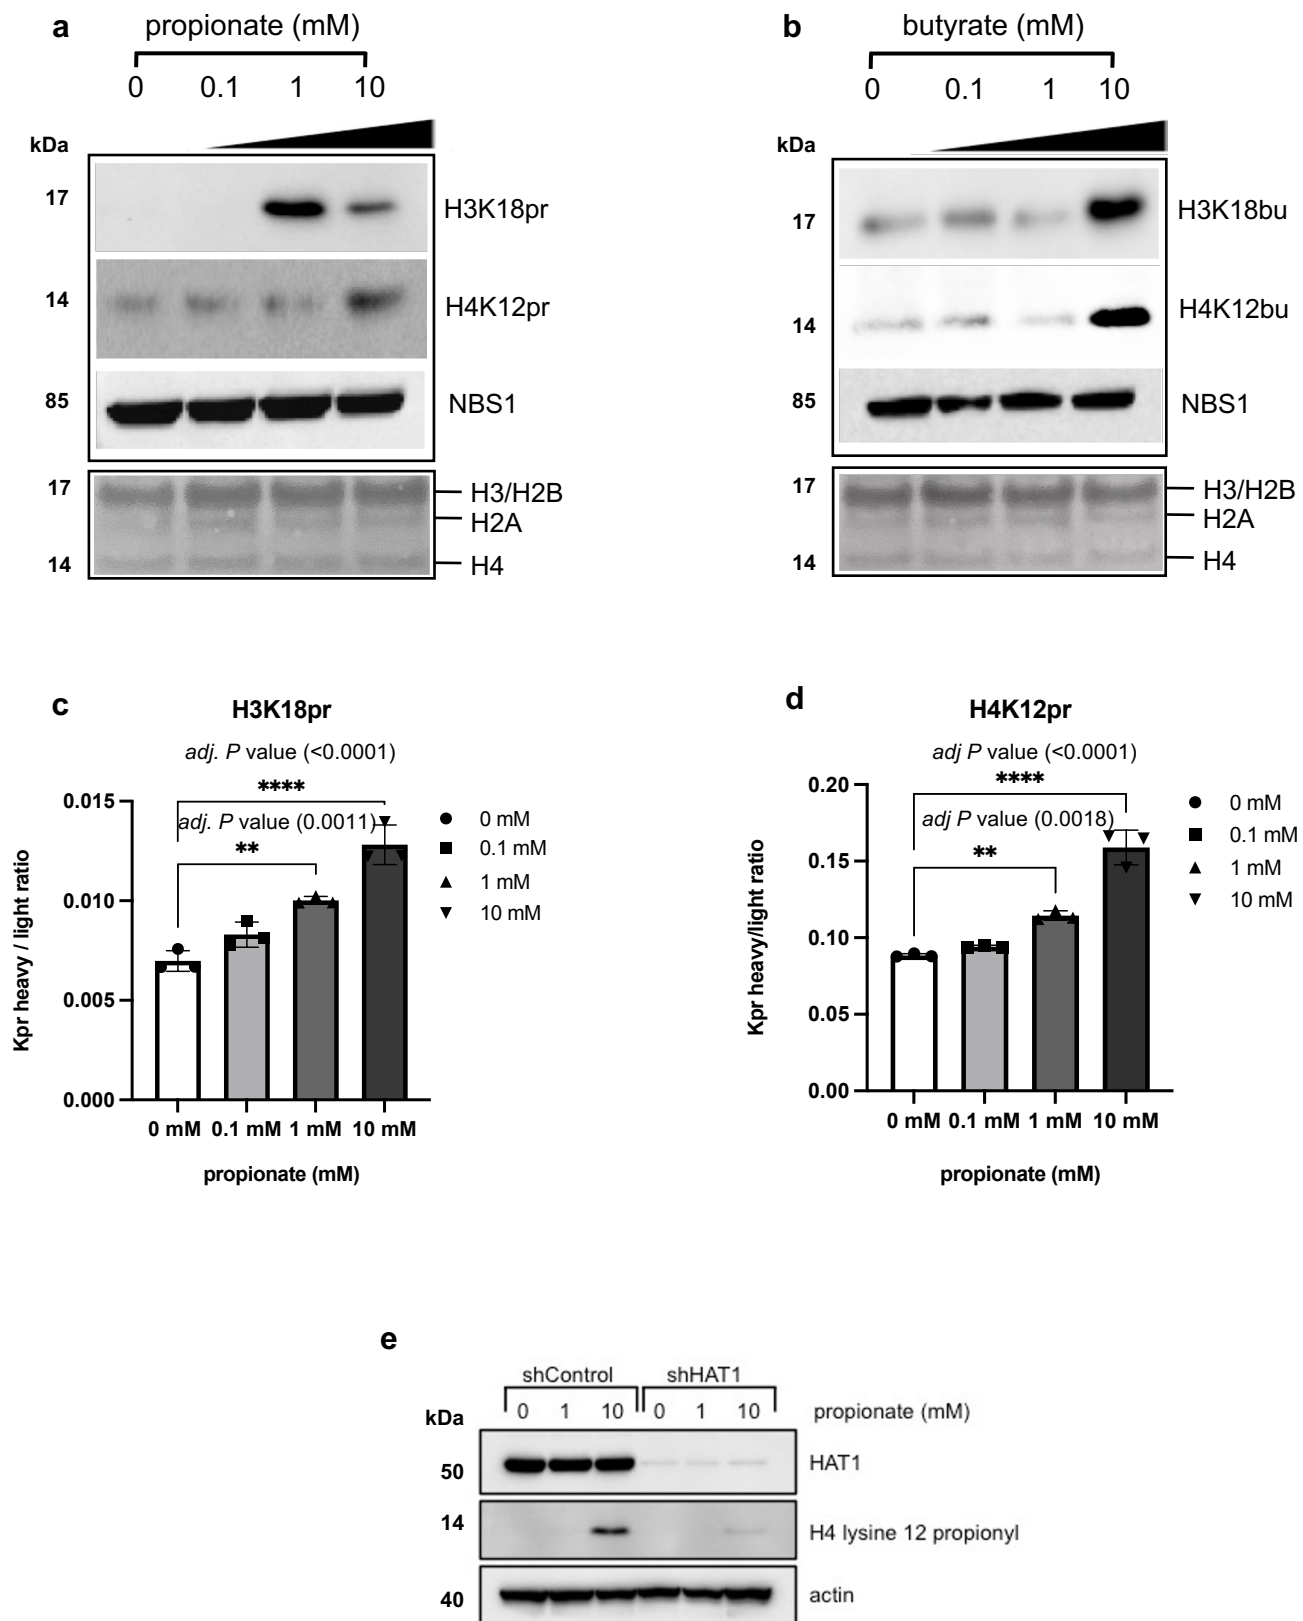

**Supplementary Fig. 1** | Immunoblots of acid-extracted **a** H3K18/H4K12pr and **b** H3K18/H4K12bu histone marks at 0 – 10 mM sodium propionate/butyrate treatments with anti-NBS1 as control (top). SDS-PAGE of histones H2A/B, H3/H4 (bottom). Dose-dependent  $^{13}\text{C}$ -propionate incorporation into H3 and H4 as measured by increases in the heavy/light propionyl lysine containing peptides. Heavy/light propionyl lysine containing peptides representing **c** H3K18pr and **d** H4K12pr levels at 0, 0.1, 1, and 10 mM  $^{13}\text{C}$ -propionate supplementation (mean  $\pm$  SD,  $n = 3$ ). Multiple comparisons by ordinary, one-way ANOVA followed by hypothesis testing using the Bonferroni correction method with 0.05  $P$  value cutoff. \*\* $P < 0.01$ , \*\*\*\*  $P < 0.0001$  **e** Depletion of HAT1 diminishes incorporation of propionate into the H4 lysine 12 site.

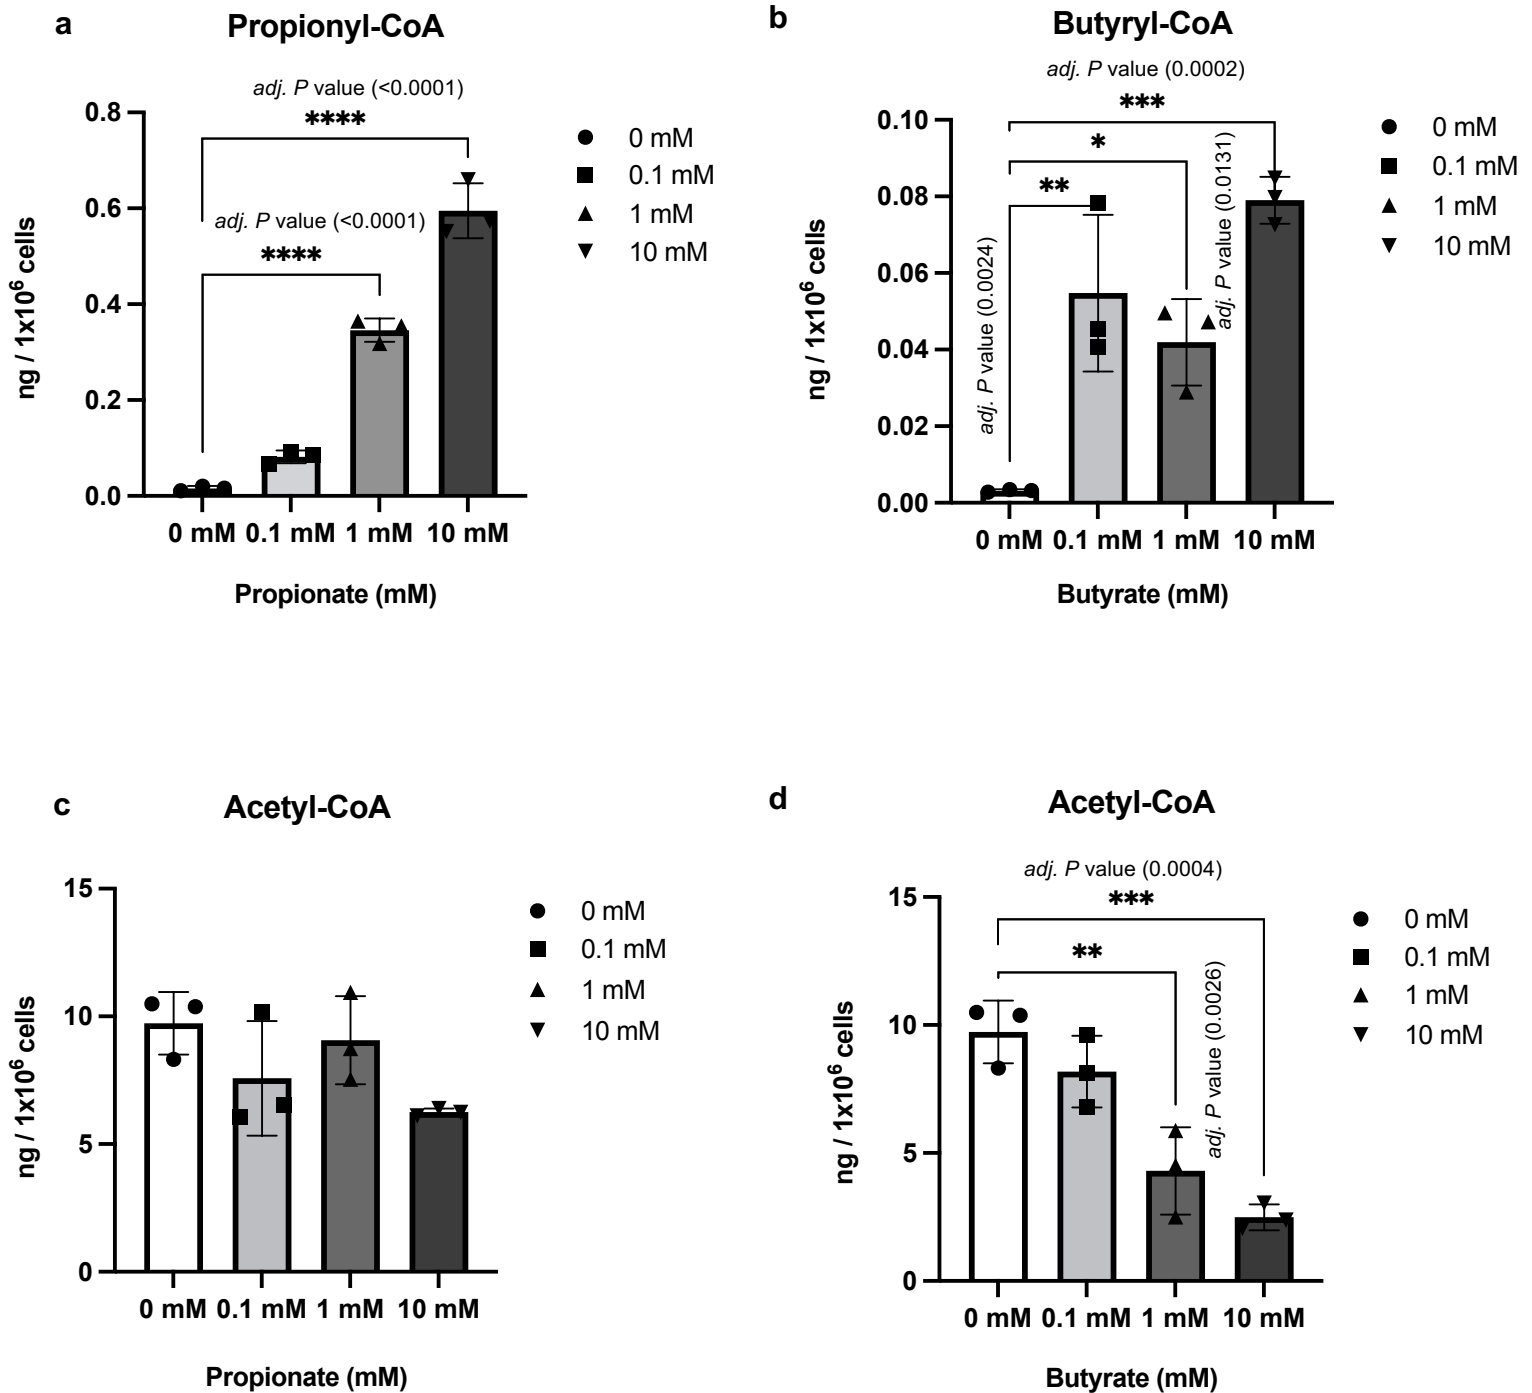

**Supplementary Fig. 2** | Quantitative analysis of acyl-CoA levels by LC-MS/MS following SCFA supplementation. **a** Dose-dependent increases in **a** Propionyl-CoA and **b** Butyryl-CoA levels upon increasing propionate and butyrate supplementation at 0, 0.1, 1, and 10 mM. Acetyl-CoA levels upon increasing **c** propionate and **d** butyrate supplementation. Quantitative analysis was done by multiple reaction monitoring (MRM) using an internal standard approach. Calculated Acyl-Co concentrations in each sample were normalized to the number of cells (mean  $\pm$  SD,  $n = 3$ ). Multiple comparisons by ordinary, one-way ANOVA using hypothesis testing followed by Bonferroni correction method with 0.05 *P* value cutoff. \**P* < 0.05, \*\**P* < 0.01, \*\*\**P* < 0.001, \*\*\*\**P* < 0.0001.

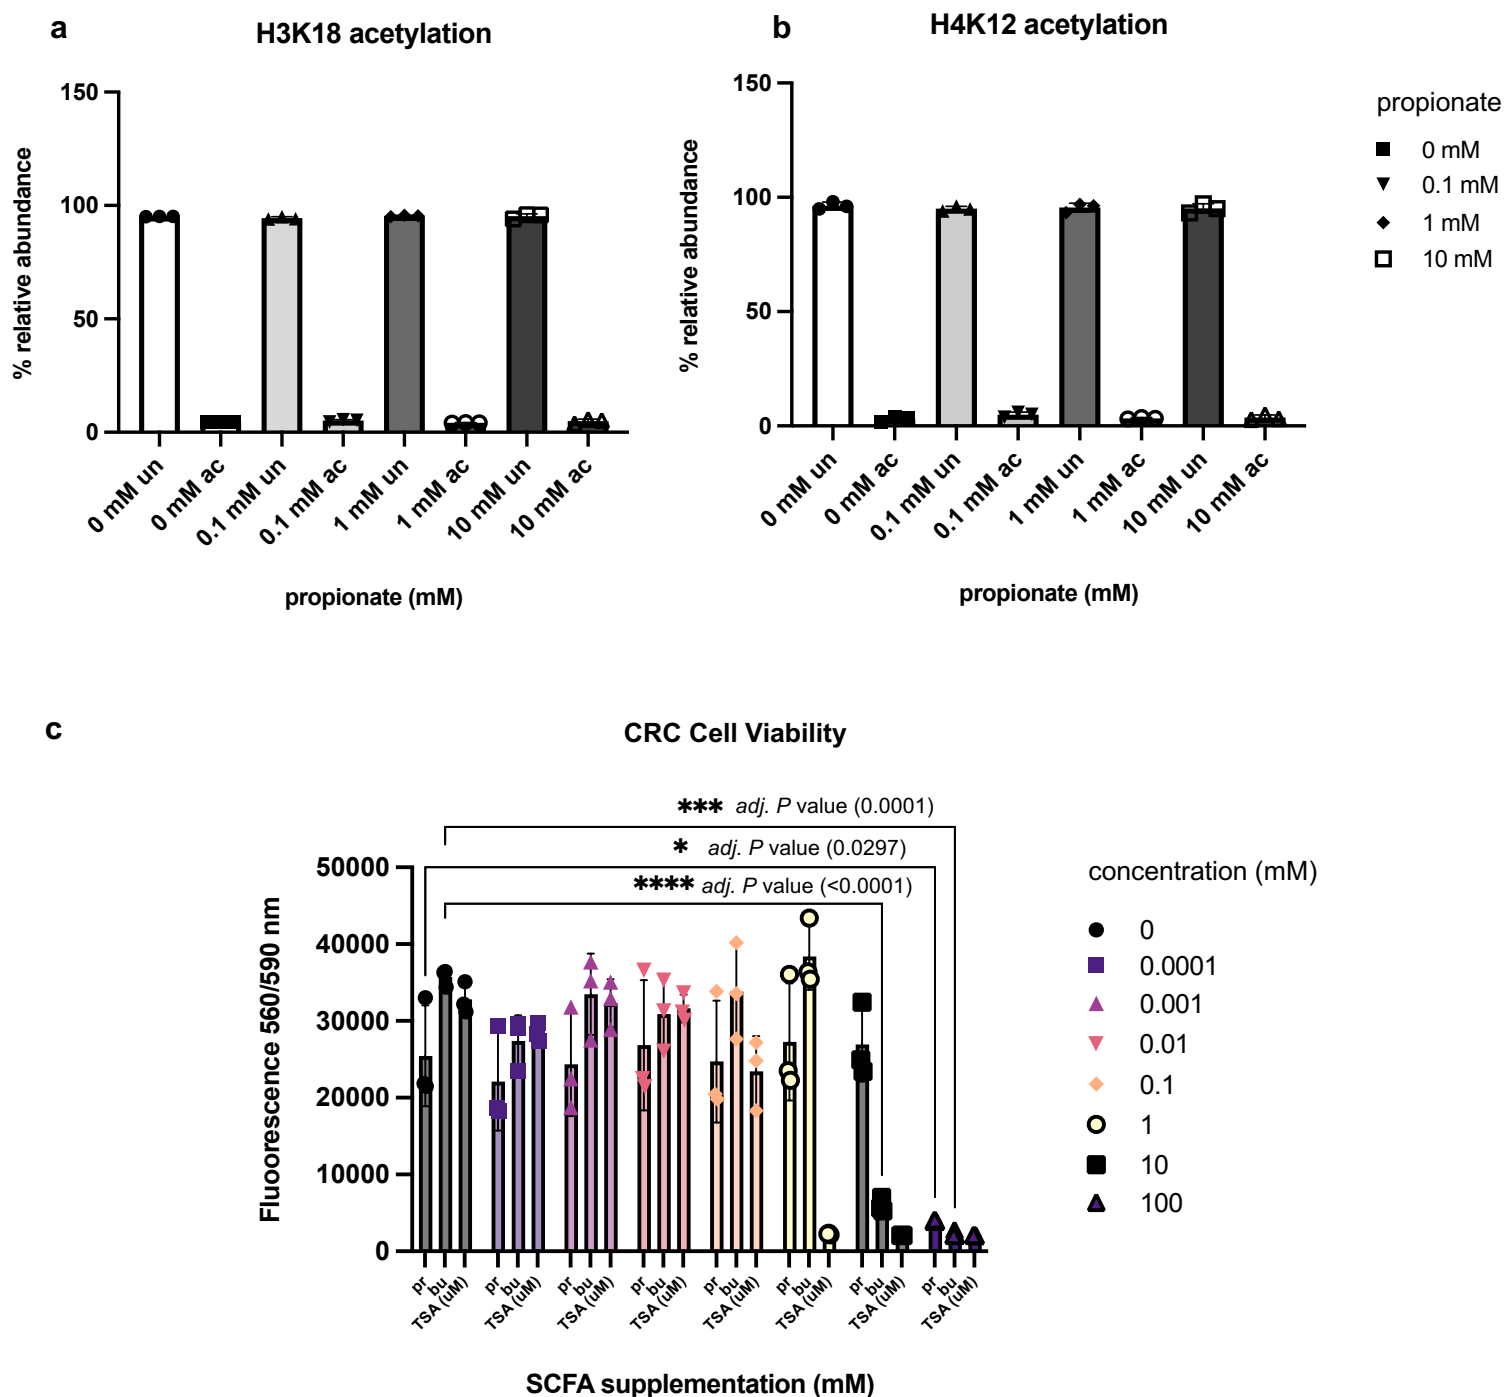

**Supplementary Fig. 3** | H3 and H4 acetylated vs unmodified states as a function of propionate supplementation. Relative abundances of acetylated vs unmodified states on **a** H3K18 **b** H4K12 **c** H3K9 and **d** H3K23 following 0, 0.1, 1, and 10 mM propionate supplementation (mean  $\pm$  SD, n = 3). **e** CRC cell viability as a function of NaPr and NaBu supplementation over 72 hrs. as measured by CellTiter-Blue® fluorescence assay. TSA, a known HDAC inhibitor with IC<sub>50</sub> ~ 2 nM was used as a negative control on a  $\mu$ M level. (mean  $\pm$  SD, n = 3). Multiple comparisons by two-way ANOVA using statistical hypothesis testing followed by Bonferroni correction method with 0.05 *P* value cutoff. \**P* < 0.05, \*\*\**p* < 0.001, \*\*\*\**p* < 0.0001.



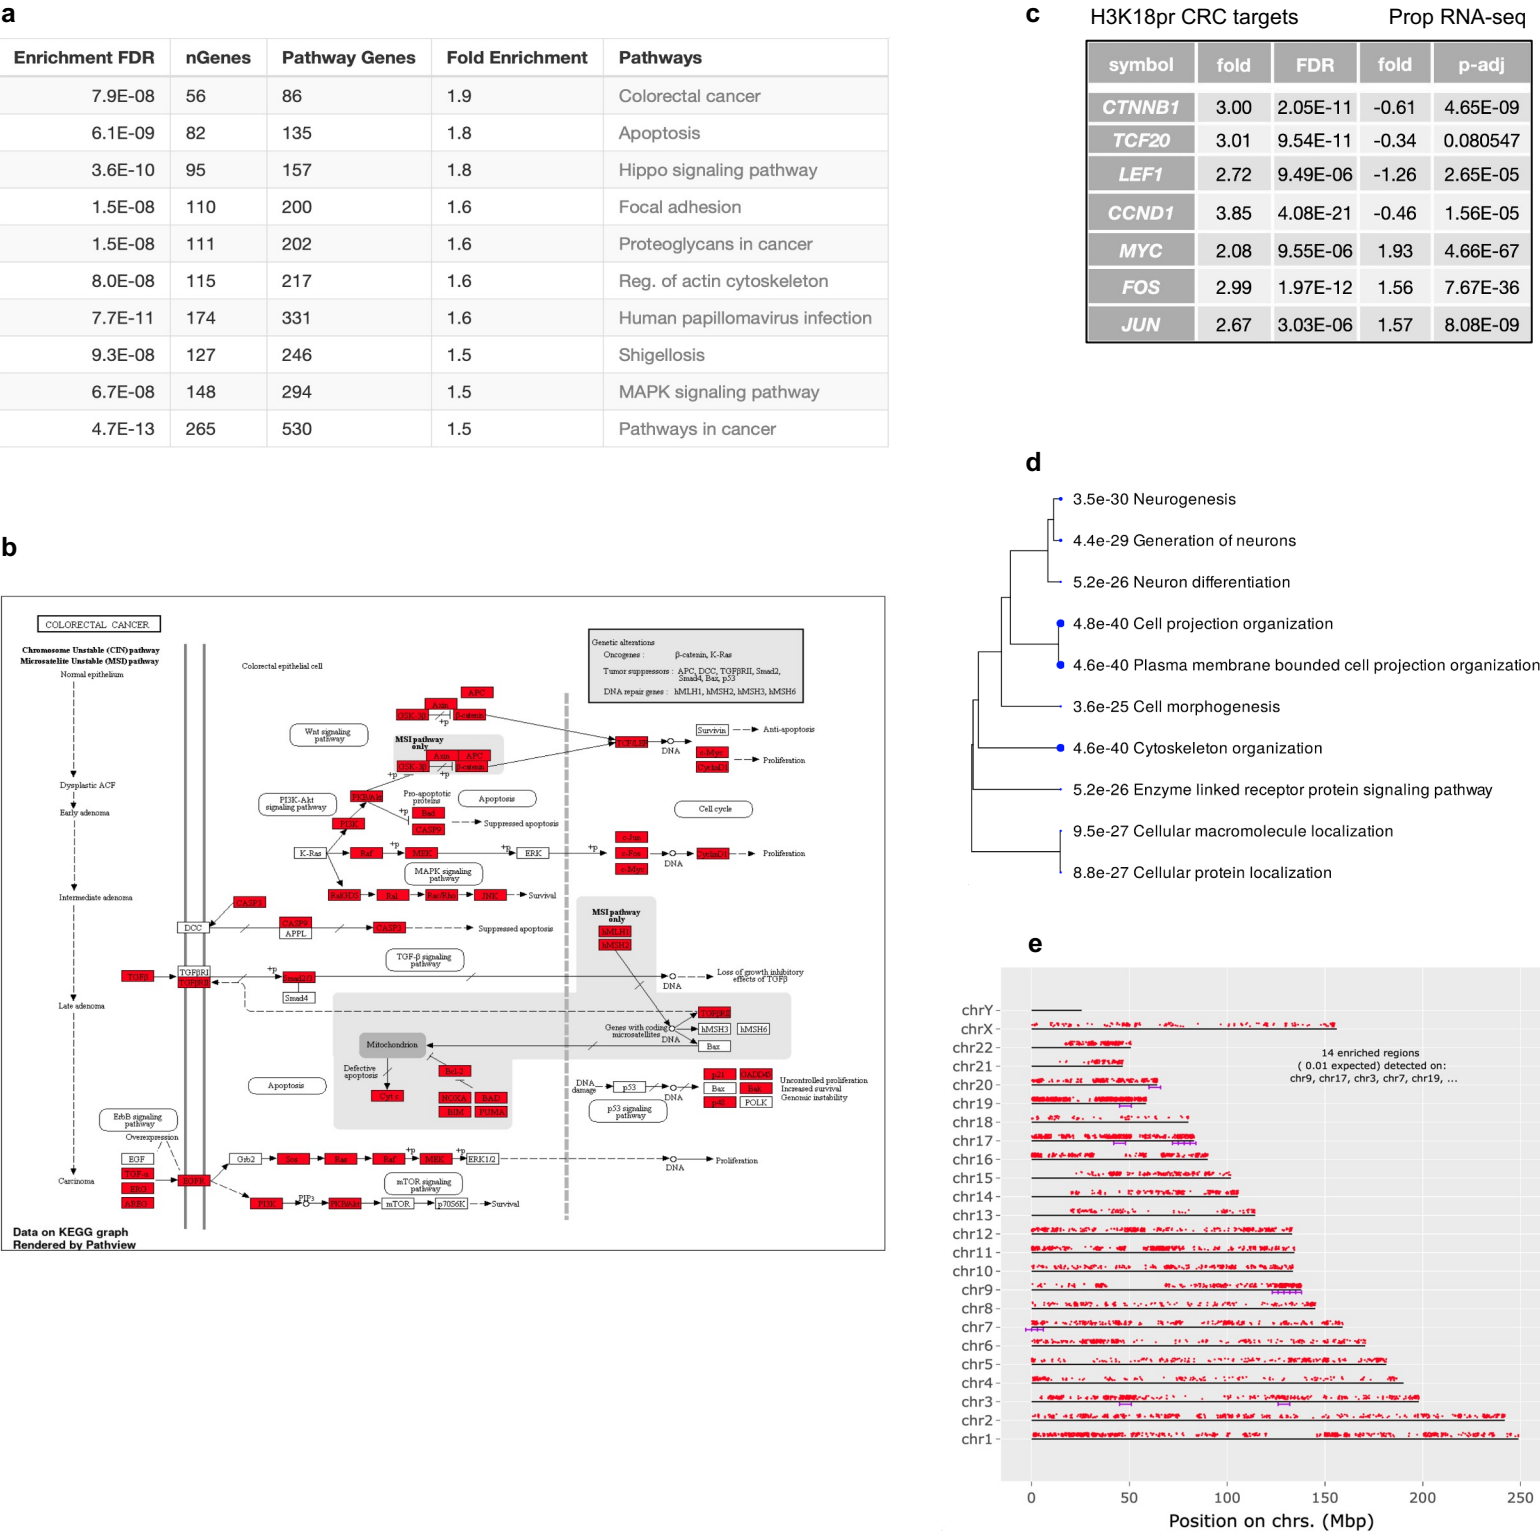

**Supplementary Fig. 4 | KEGG pathway analysis of H3K18pr-associated genes. a** Top ten pathways with their number of genes and log2 fold enrichment. FDR is calculated from a nominal *P* value obtained from a hypergeometric test (*FDR* < 0.05). Fold enrichment is calculated as percentage of H3K18pr differentially bound genes associated with a pathway divided by the corresponding percentage in input. **b** CRC KEGG pathway enrichment by Pathview. Genes that are overrepresented compared to input are in red. **c** H3K18pr-associated differential binding of key CRC genes and log2 fold changes in their expression levels, as determined by differential RNA-seq of 10 mM treated vs. untreated conditions. *n* = 3 experimental replicates per condition (*FDR* < 0.05). **d** Hierarchical clustering tree summary of correlations among significant pathways in H3K18pr-associated annotated genes. Hierarchical clustering of the pathways was performed using ShinyGO. Pathways were clustered together based on shared genes and gene enrichment analysis was performed using two-sided Fisher's exact test, and *FDR* correction was applied to adjust for multiple comparisons in the pathway analysis and hierarchical clustering. Size of dots indicates statistically significant *FDR* adjusted (*FDR* < 0.05) *P* values. **e** Chromosomal position of H3K18pr-associated regions represented by red dots. Purple lines represent statistically significant enrichment compared to input. The genome was scanned with a sliding window (size 6 Mb) further subdivided into 2 equal-sized steps for sliding. Within each window a hypergeometric test was used to test for enrichment over input. *FDR*-adjusted *P* value cutoff for window was 1E-05. Chromosomes may be partly shown due to scaling to last genes location. Gene chromosomal mapping was performed using ShinyGO.

**a**

| Enrichment FDR | nGenes | Pathway Genes | Fold Enrichment | Pathways                                    |
|----------------|--------|---------------|-----------------|---------------------------------------------|
| 4.6E-11        | 104    | 134           | 1.6             | Ribosome                                    |
| 4.5E-10        | 116    | 157           | 1.6             | Hippo signaling pathway                     |
| 2.0E-08        | 103    | 142           | 1.5             | Spinocerebellar ataxia                      |
| 9.4E-09        | 120    | 169           | 1.5             | Protein processing in endoplasmic reticulum |
| 4.5E-10        | 203    | 306           | 1.4             | Huntington disease                          |
| 2.0E-08        | 167    | 252           | 1.4             | Endocytosis                                 |
| 2.3E-11        | 240    | 363           | 1.4             | Amyotrophic lateral sclerosis               |
| 1.9E-12        | 307    | 475           | 1.4             | Pathways of neurodegeneration               |
| 3.4E-09        | 243    | 383           | 1.3             | Alzheimer disease                           |
| 7.6E-09        | 838    | 1527          | 1.2             | Metabolic pathways                          |

**b**

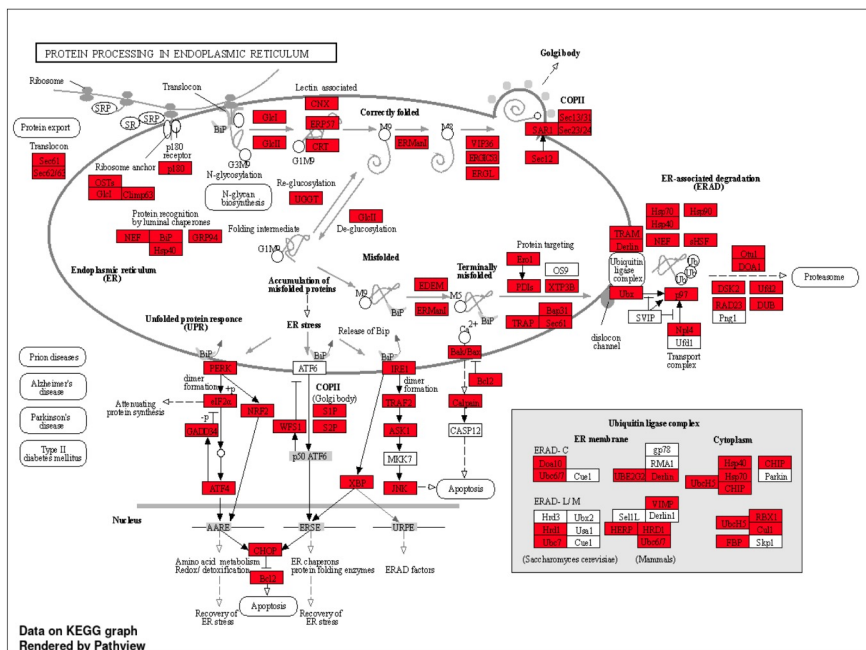

C

| H4K12pr CRC targets |      |          | Prop RNA-seq |          |
|---------------------|------|----------|--------------|----------|
| symbol              | fold | FDR      | fold         | p-adj    |
| <i>CTNNB1</i>       | 3.17 | 5.90E-15 | -0.61        | 4.65E-09 |
| <i>TCF20</i>        | 3.26 | 0.000136 | -0.34        | 0.080547 |
| <i>LEF1</i>         | 2.01 | 0.0019   | -1.26        | 2.65E-05 |
| <i>CCND1</i>        | 2.8  | 5.54E-14 | -0.46        | 1.56E-05 |
| <i>MYC</i>          | 2.4  | 2.09E-11 | 1.93         | 4.66E-67 |
| <i>FOS</i>          | 3.05 | 1.28E-07 | 1.56         | 7.67E-36 |
| <i>JUN</i>          | 3.32 | 7.54E-18 | 1.57         | 8.08E-09 |

**d**

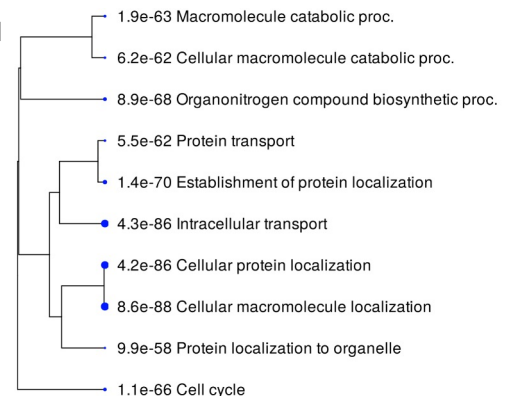

e

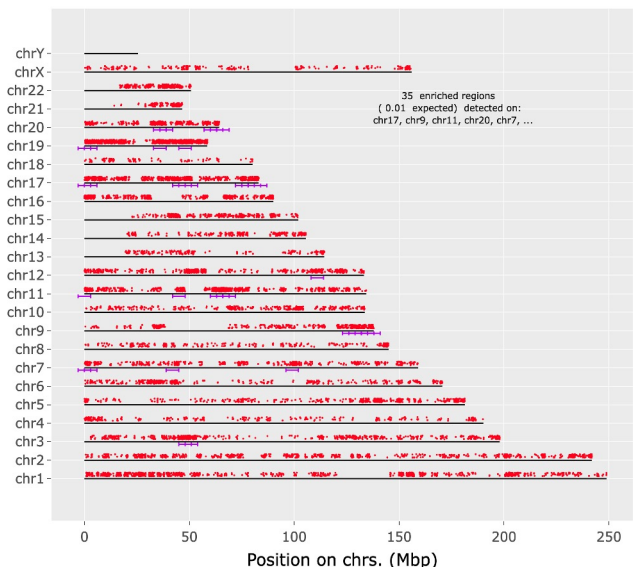

**Supplementary Fig. 5** | KEGG pathway analysis of H4K12pr associated genes. **a** Top ten pathways with their number of genes and log2 fold enrichment. FDR is calculated from a nominal *P* value obtained from a hypergeometric test ( $FDR < 0.05$ ). Fold enrichment is calculated as percentage of H4K12pr differentially-bound genes associated with a pathway divided by the corresponding percentage in input. **b** Protein Processing in ER KEGG pathway enrichment by Pathview. Genes that are overrepresented compared to input are in red. **c** H4K12pr-associated differential binding of key CRC genes and log2 fold changes in their expression levels, as determined by differential RNA-seq of 10 mM treated vs. untreated conditions.  $n = 3$  experimental replicates per condition ( $FDR < 0.05$ ). **d** Hierarchical clustering tree summary of correlations among significant pathways in H3K18pr-associated annotated genes. Hierarchical clustering of the pathways was performed using ShinyGO. Pathways were clustered together based on shared genes and gene enrichment analysis was performed using two-sided Fisher's exact test, and FDR correction was applied to adjust for multiple comparisons in the pathway analysis and hierarchical clustering. Size of dots indicates statistically significant FDR adjusted ( $FDR < 0.05$ ) *P* values. **e** Chromosomal position of H3K18pr-associated regions represented by red dots. Purple lines represent statistically significant enrichment compared to input. The genome was scanned with a sliding window (size 6 Mb) further subdivided into 2 equal-sized steps for sliding. Within each window a hypergeometric test was used to test for enrichment over input. FDR-adjusted *P* value cutoff for window was  $1E-05$ . Chromosomes may be partly shown due to scaling to last genes location. Gene chromosomal mapping was performed using ShinyGO.

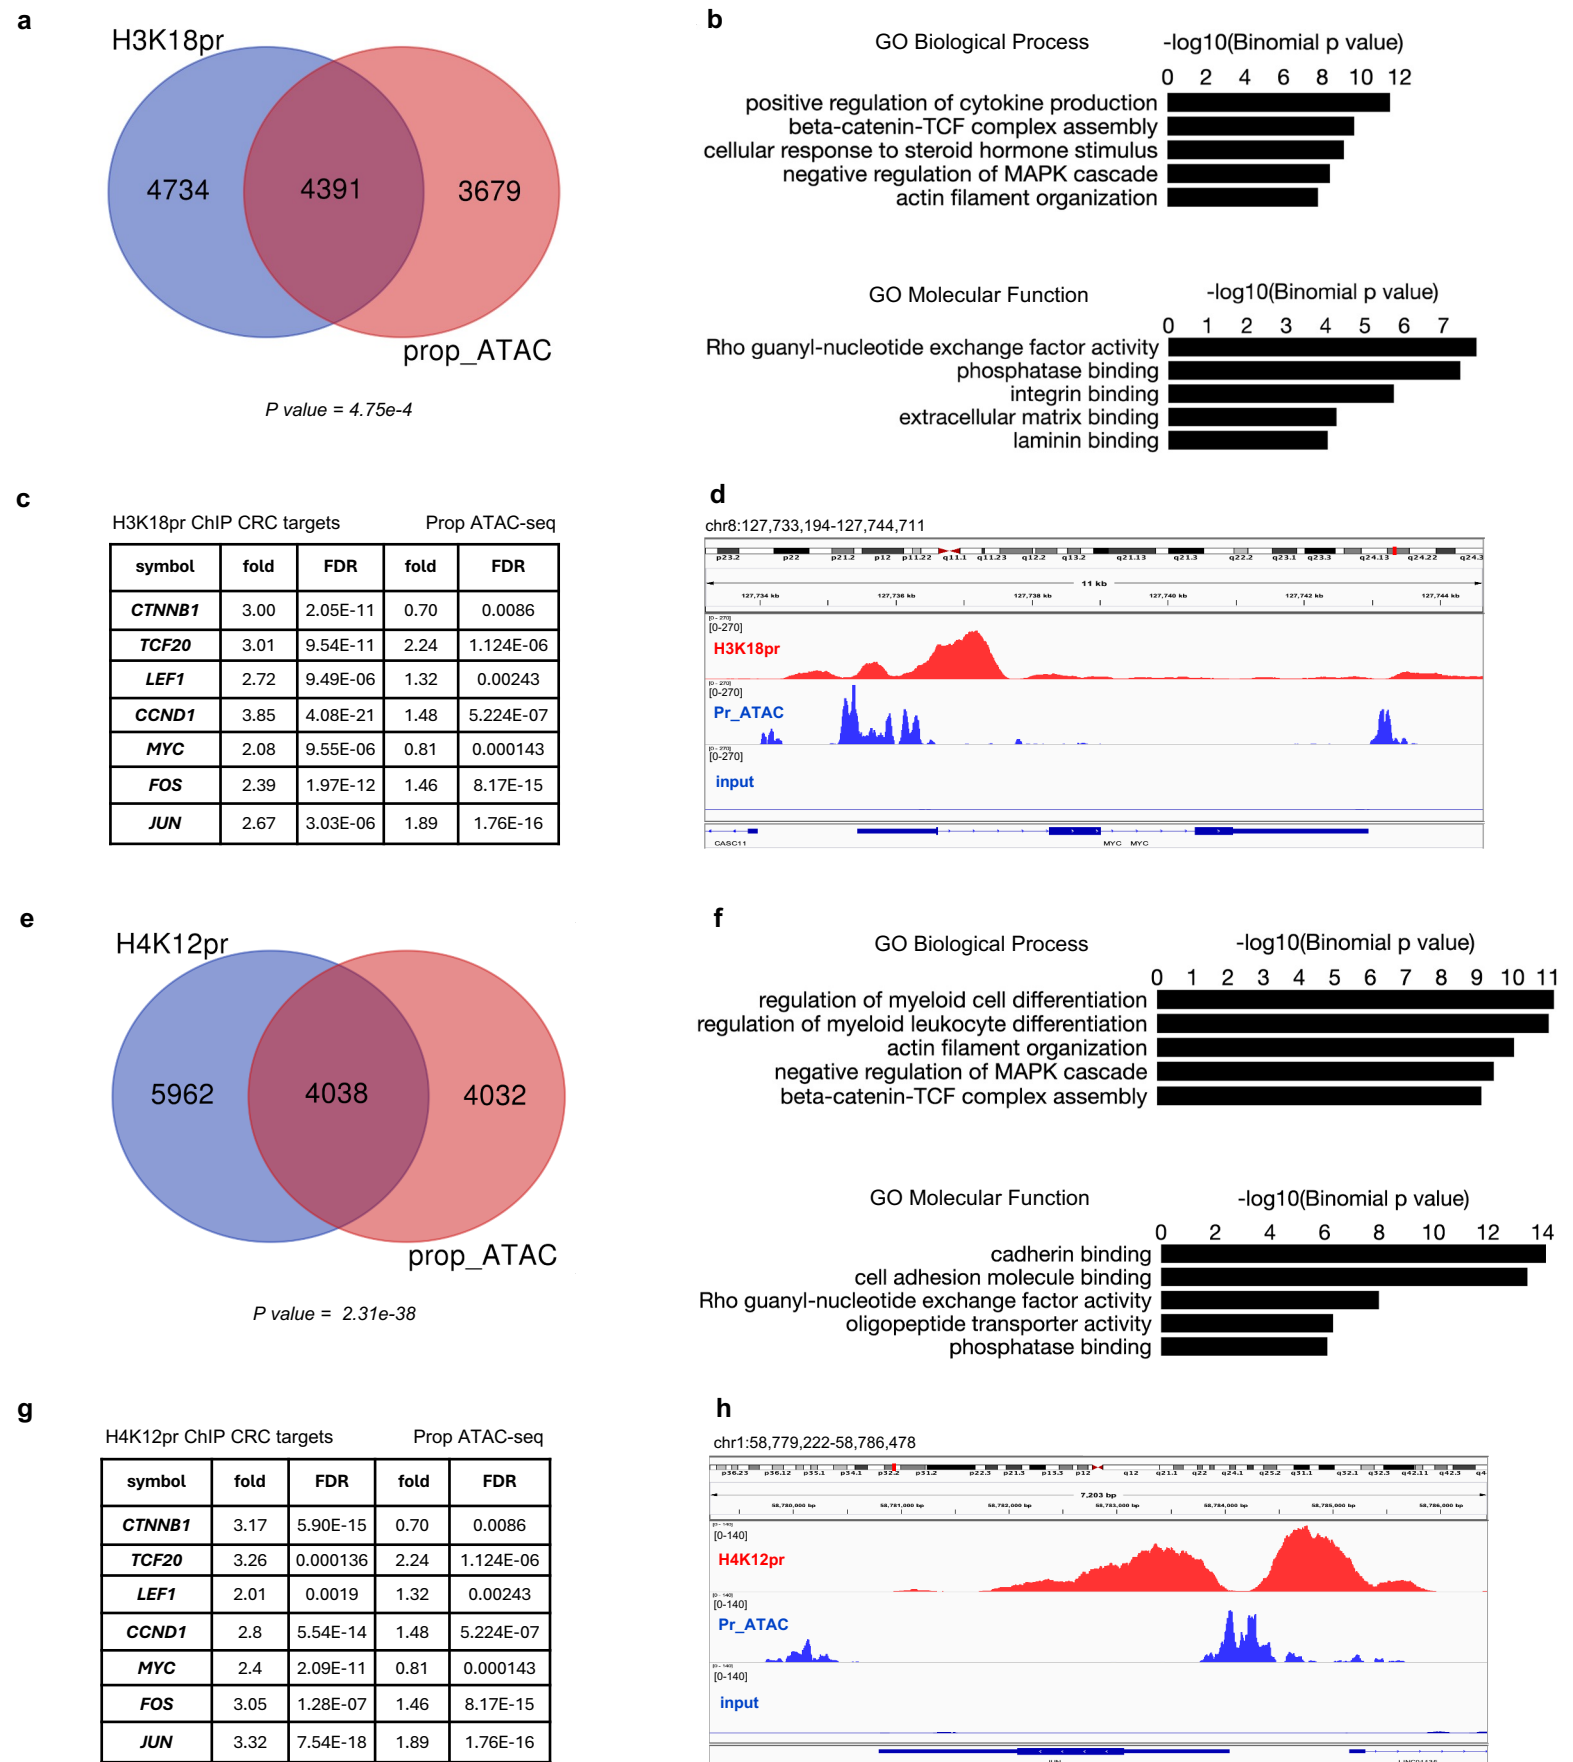

**Supplementary Fig. 6 | H3K18/H4K12pr ChIP-seq and propionyl ATAC-seq integration. a, e** Overlap between TSS-proximal regions ( $\pm 1$  Kb) for H3K18pr and H4K12pr differentially bound genes by ChIP-seq and differentially accessible genes following 10 mM propionate supplementation. Significance of overlap determined by hypergeometric test-generated  $P$  value. **b, f** GO 'Biological Process' and 'Molecular Function' pathway terms associated with H3K18pr and H4K12pr differentially bound genomic coordinates that are also present in ATAC-seq sorted by binomial  $P$  value. **c, g** Log2 fold change and FDR-adjusted  $P$  value in CRC-relevant gene targets associated with H3K18/H4K12pr ChIP-seq and propionyl ATAC-seq. **d, h** Signal tracks for *MYC* and *JUN* regions showing ChIP-seq and ATAC-seq profiles with input as background.

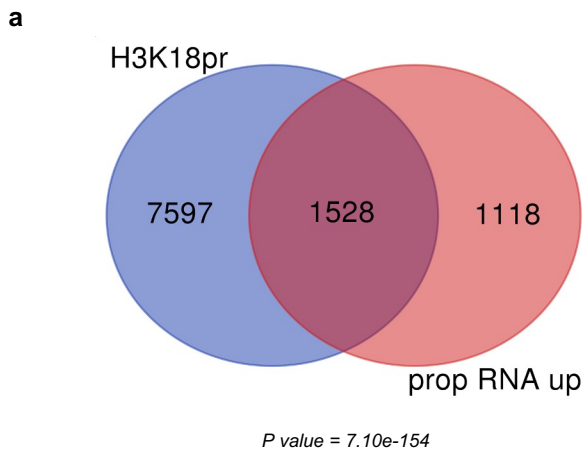

**b**

| Enrichment FDR | nGenes | Fold Enrichment | Pathways                                             |
|----------------|--------|-----------------|------------------------------------------------------|
| 2.1E-19        | 159    | 2.2             | Cell morphogenesis                                   |
| 1.4E-20        | 214    | 2               | Generation of neurons                                |
| 9.3E-19        | 194    | 2               | Neuron differentiation                               |
| 2.0E-19        | 207    | 2               | Cell migration                                       |
| 8.4E-21        | 228    | 2               | Neurogenesis                                         |
| 9.3E-19        | 210    | 1.9             | Plasma membrane bounded cell projection organization |
| 2.0E-19        | 224    | 1.9             | Cell motility                                        |
| 2.0E-19        | 224    | 1.9             | Localization of cell                                 |
| 1.5E-18        | 213    | 1.9             | Cell projection organization                         |
| 1.1E-20        | 247    | 1.9             | Locomotion                                           |

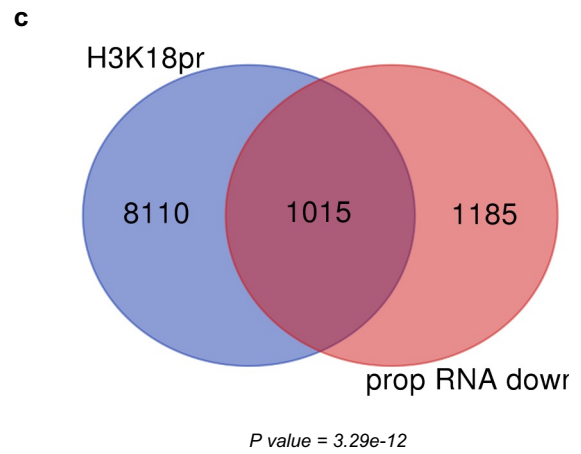

**d**

| Enrichment FDR | nGenes | Fold Enrichment | Pathways                                      |
|----------------|--------|-----------------|-----------------------------------------------|
| 4.7E-20        | 88     | 3.3             | Mitotic cell cycle phase transition           |
| 4.4E-34        | 145    | 3.2             | Mitotic cell cycle proc.                      |
| 9.0E-35        | 152    | 3.2             | Chromosome organization                       |
| 9.4E-36        | 160    | 3.1             | Mitotic cell cycle                            |
| 9.9E-26        | 120    | 3.1             | Reg. of cell cycle proc.                      |
| 3.9E-26        | 131    | 2.9             | MRNA metabolic proc.                          |
| 8.4E-35        | 183    | 2.8             | Cell cycle proc.                              |
| 4.6E-27        | 147    | 2.8             | Reg. of cell cycle                            |
| 2.5E-38        | 226    | 2.6             | Cell cycle                                    |
| 1.2E-20        | 184    | 2.1             | Pos. reg. of macromolecule biosynthetic proc. |

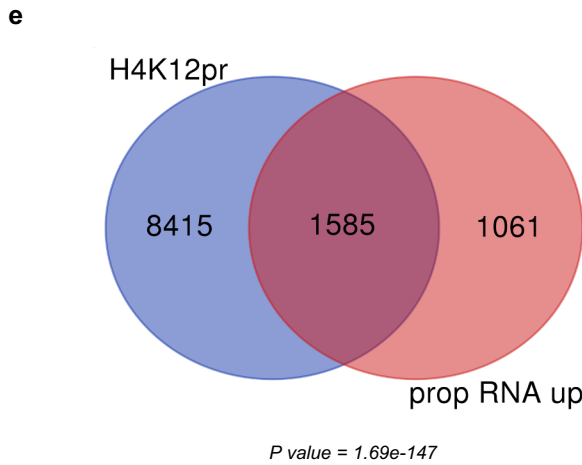

**f**

| Enrichment FDR | nGenes | Fold Enrichment | Pathways                                       |
|----------------|--------|-----------------|------------------------------------------------|
| 5.2E-15        | 118    | 2.3             | Actin cytoskeleton organization                |
| 7.8E-15        | 120    | 2.3             | Cell morphogenesis involved in differentiation |
| 5.4E-15        | 127    | 2.2             | Localization within membrane                   |
| 7.8E-15        | 127    | 2.2             | Actin filament-based proc.                     |
| 6.4E-18        | 161    | 2.2             | Cell morphogenesis                             |
| 5.4E-15        | 196    | 1.9             | Cytoskeleton organization                      |
| 9.7E-15        | 201    | 1.8             | Generation of neurons                          |
| 2.0E-15        | 217    | 1.8             | Neurogenesis                                   |
| 3.0E-14        | 231    | 1.7             | Locomotion                                     |
| 3.3E-14        | 230    | 1.7             | Cellular macromolecule localization            |

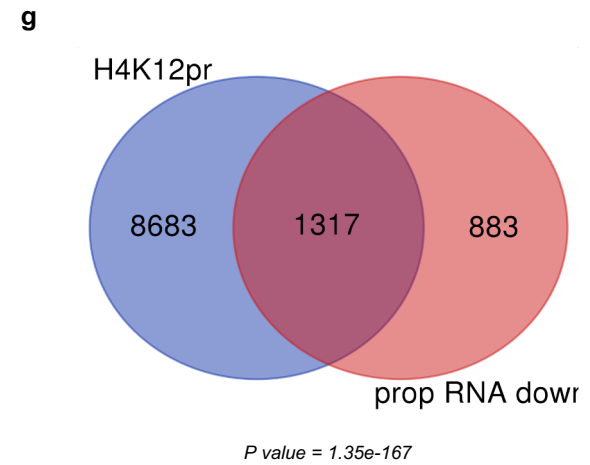

**h**

| Enrichment FDR | nGenes | Fold Enrichment | Pathways                     |
|----------------|--------|-----------------|------------------------------|
| 2.4E-36        | 107    | 4.3             | Reg. of mRNA metabolic proc. |
| 4.2E-37        | 118    | 4               | RNA splicing                 |
| 1.0E-51        | 199    | 3.4             | MRNA metabolic proc.         |
| 1.5E-42        | 191    | 3.1             | Chromosome organization      |
| 4.2E-37        | 174    | 3               | Mitotic cell cycle proc.     |
| 1.2E-40        | 195    | 2.9             | Mitotic cell cycle           |
| 7.4E-38        | 186    | 2.9             | RNA processing               |
| 7.1E-37        | 192    | 2.8             | Reg. of cell cycle           |
| 2.2E-44        | 234    | 2.7             | Cell cycle proc.             |
| 1.6E-47        | 286    | 2.5             | Cell cycle                   |

**Supplementary Fig. 7 | H3K18/H4K12pr ChIP-seq and propionyl RNA-seq integration.** Overlap between TSS-proximal regions (+/- 1 Kb) for H3K18pr and H4K12pr associated genes by ChIP-seq, and upregulation of gene expression in 10 mM NaPr treated group **a**, **e** vs downregulation in the untreated group **c**, **g** by RNA-seq. Significance of overlap determined by hypergeometric test-generated  $P$  value. GO 'Biological Process' pathway terms associated with overlapping Kpr targets and upregulated genes **b**, **f** and downregulated genes **d**, **h** sorted by log2 fold enrichment.



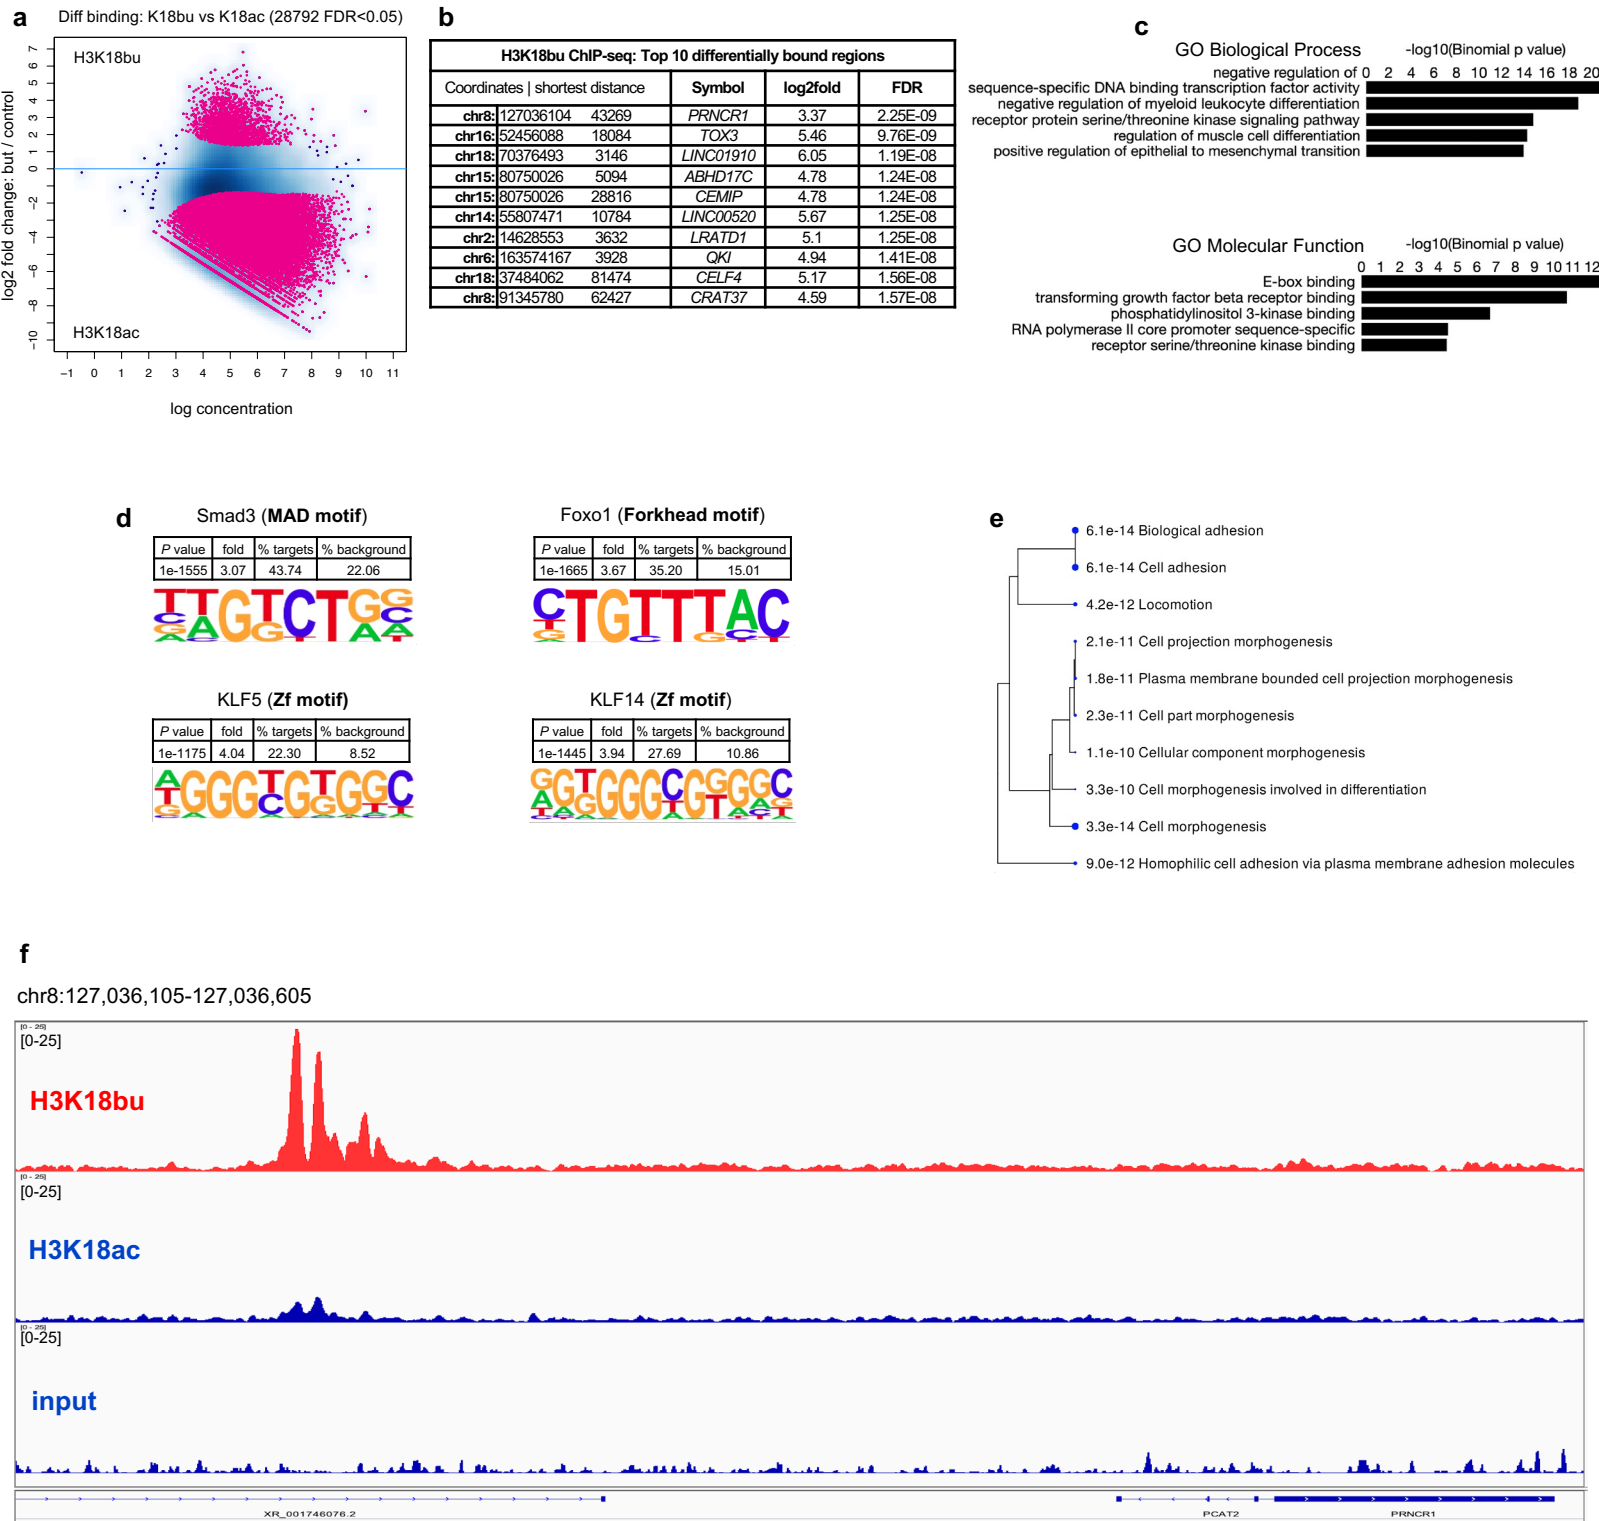

**Supplementary Fig. 8 | Genome-wide H3K18bu distribution.** **a** H3K18bu vs H3K18ac differential binding following 1 mM butyrate supplementation. Sites identified as significantly differentially bound are shown in red. Differential binding was performed by DiffBind package with DESeq2 using a two-sided tests for both increased and decreased binding affinity between conditions followed by multiple hypothesis testing and FDR correction. **b** Top ten differentially bound regions associated with H3K18bu sorted by false-discovery rate adjusted  $P$  value (FDR < 0.05). **c** Top GO 'Biological Process' and 'Molecular Function' terms associated with H3K18bu-bound *cis*-regulatory elements determined by GREAT against a whole genome background using a binomial test over genomic regions, followed by multiple hypothesis testing using FDR corrected  $P$  values (FDR < 0.05). **d** Differential motif analysis of H3K18bu vs H3K18ac peaks was analyzed by HOMER, using a one-sided hypergeometric test for overrepresentation (enrichment) of motifs in the target sequences compared to the background, followed by multiple hypothesis testing and FDR correction. **e** Hierarchical clustering tree summary of correlations among significant pathways in H3K18pr-associated annotated genes. Hierarchical clustering of the pathways was performed using ShinyGO. Pathways were clustered together based on shared genes and gene enrichment analysis was performed using two-sided Fisher's exact test, and FDR correction was applied to adjust for multiple comparisons in the pathway analysis and hierarchical clustering. Size of dots indicates statistically significant FDR adjusted (FDR < 0.05)  $P$  values. **f** Signal tracks of 71 Kb-spanning *PRNCR1* region showing H3K18bu vs H3K18ac binding with input as background.

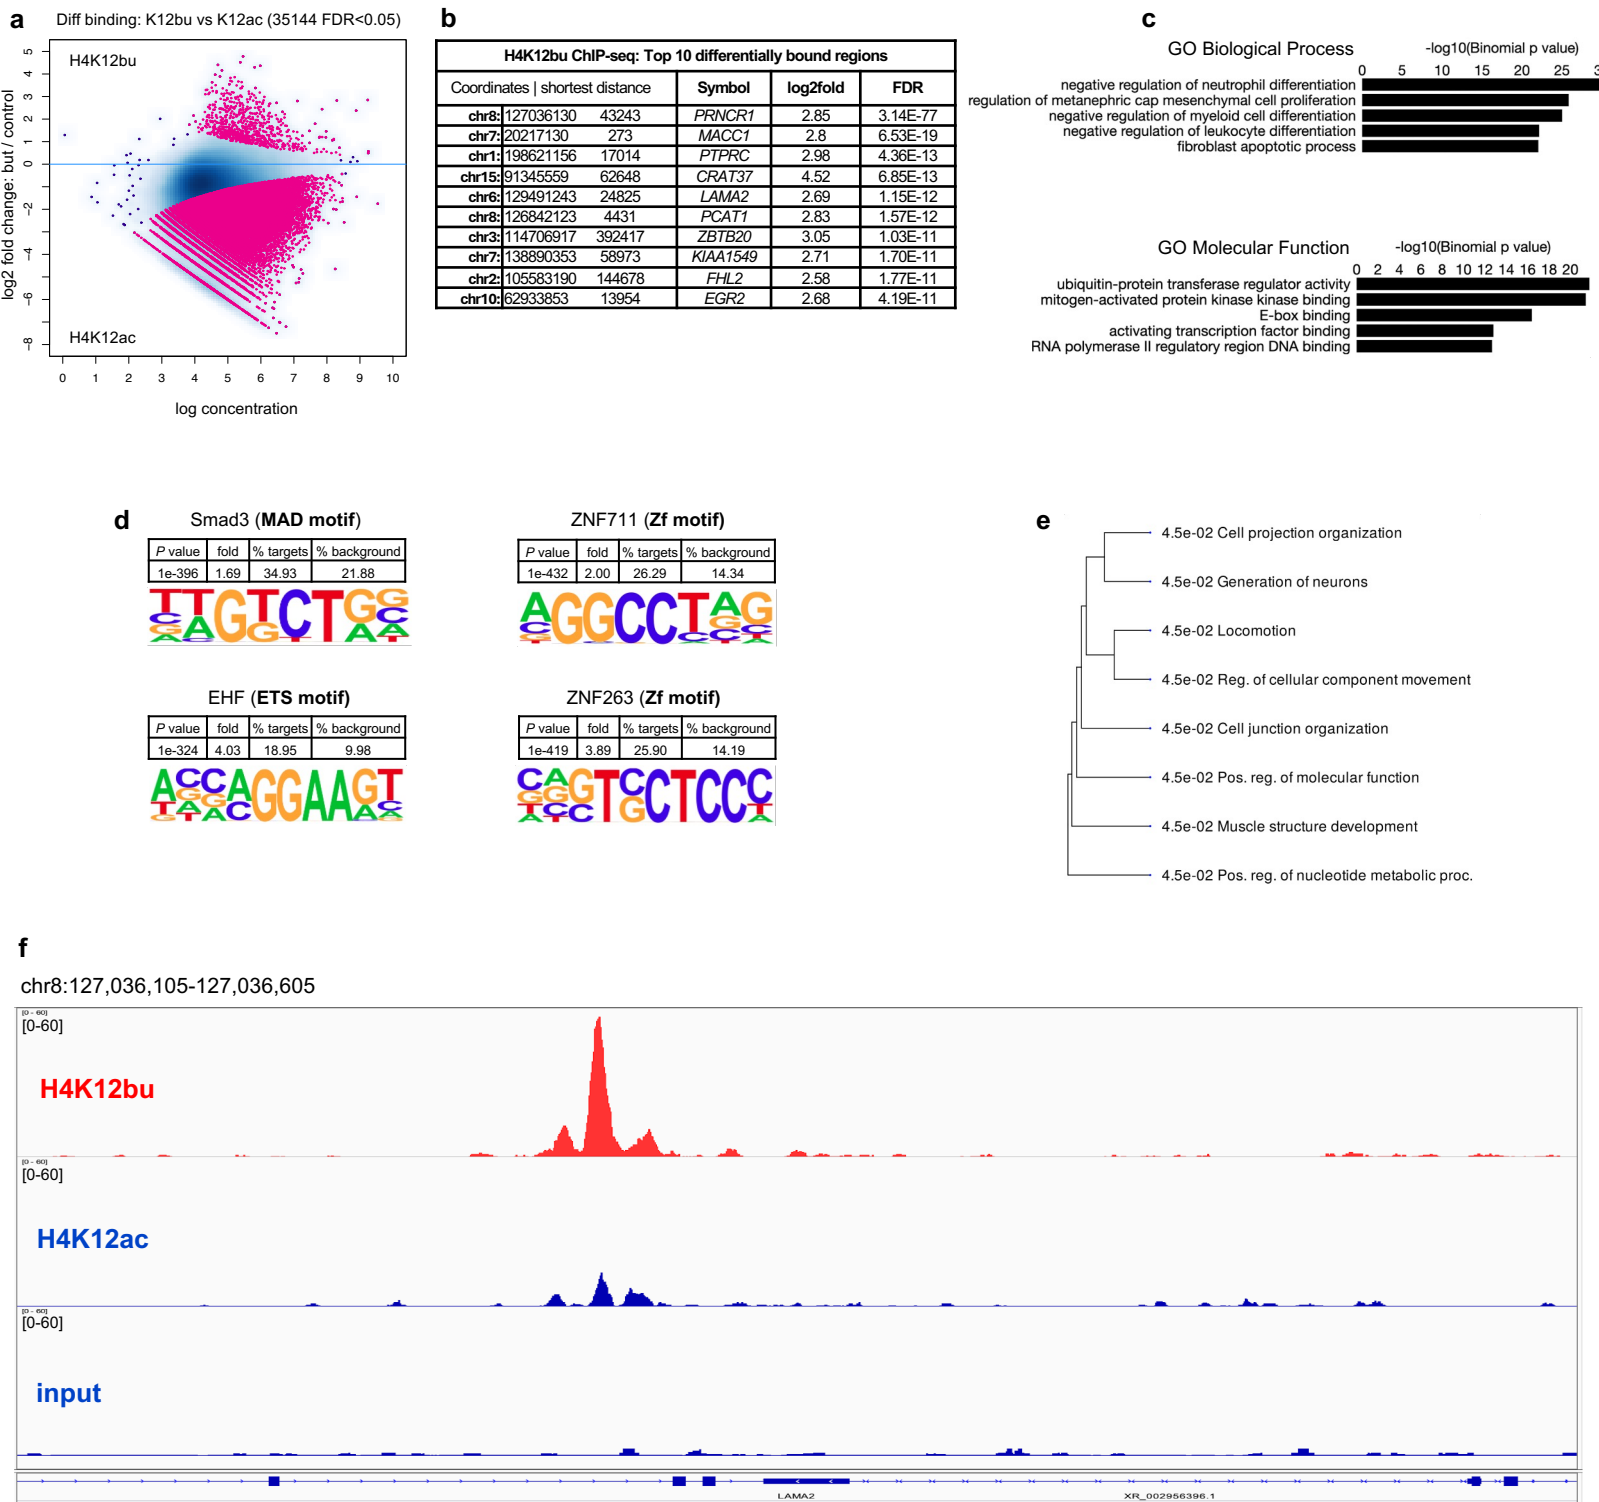

**Supplementary Fig. 9** | Genome-wide H4K12bu distribution. **a** H4K12bu vs H4K12ac differential binding following 1 mM butyrate supplementation. Sites identified as significantly differentially bound are shown in red. Differential binding was performed by DiffBind package with DESeq2 using a two-sided tests for both increased and decreased binding affinity between conditions followed by multiple hypothesis testing and FDR correction. **b** Top ten differentially bound regions associated with H4K12bu sorted by false-discovery rate adjusted  $P$  value (FDR < 0.05). **c** Top GO 'Biological Process' and 'Molecular Function' terms associated with H3K18bu-bound *cis*-regulatory elements determined by GREAT against a whole genome background using a binomial test over genomic regions, followed by multiple hypothesis testing using FDR corrected  $P$  values (FDR < 0.05). **d** Differential motif analysis of H4K12bu vs H4K12ac peaks was analyzed by HOMER, using a one-sided hypergeometric test for overrepresentation (enrichment) of motifs in the target sequences compared to the background, followed by multiple hypothesis testing and FDR correction. **e** Hierarchical clustering tree summary of correlations among significant pathways in H4K12bu-associated annotated genes. Hierarchical clustering of the pathways was performed using ShinyGO. Pathways were clustered together based on shared genes and gene enrichment analysis was performed using two-sided Fisher's exact test, and FDR correction was applied to adjust for multiple comparisons in the pathway analysis and hierarchical clustering. Size of dots indicates statistically significant FDR adjusted (FDR < 0.05)  $P$  values. **f** Signal tracks of 20 Kb-spanning *LAMA* region showing H4K12bu vs H4K12ac binding with input as background.

Diff. accessibility: prop vs cnt (22238 FDR<0.05)

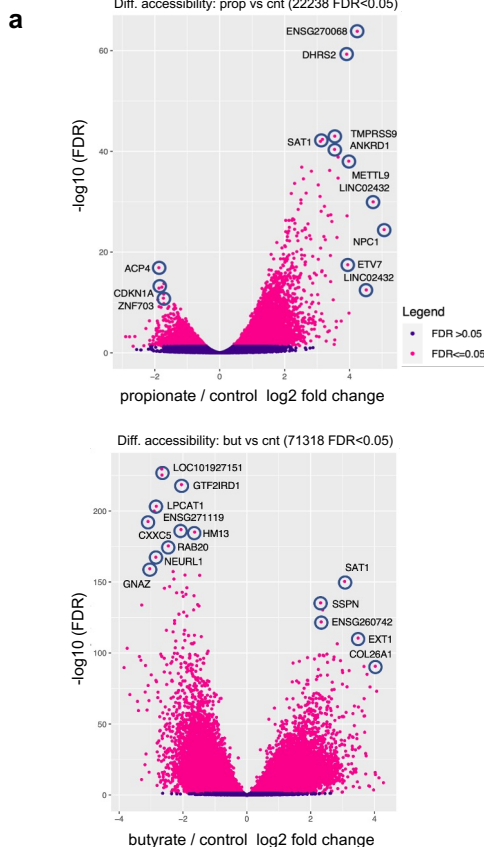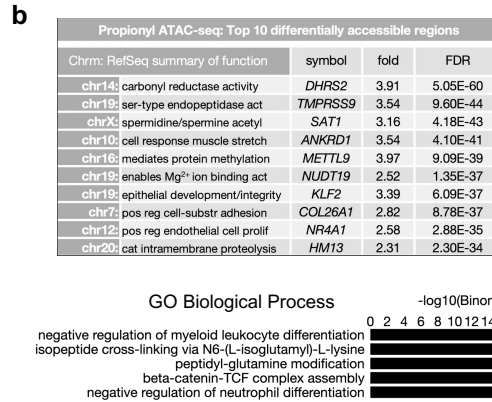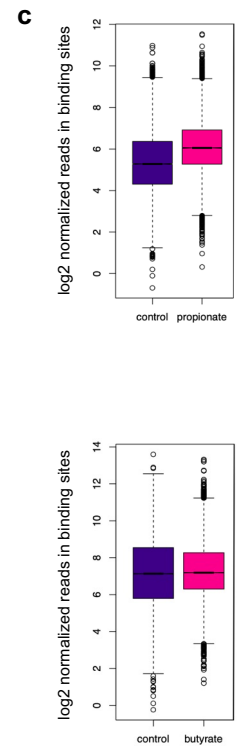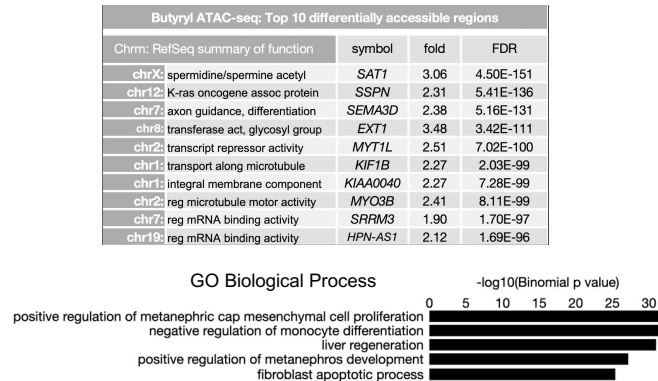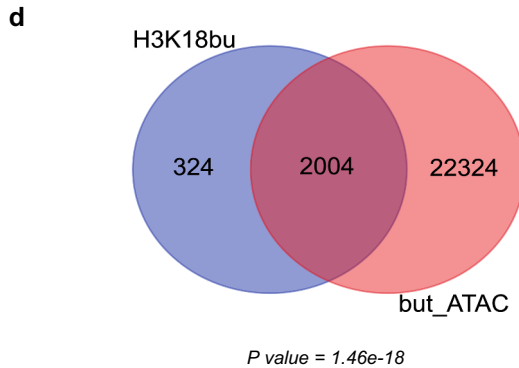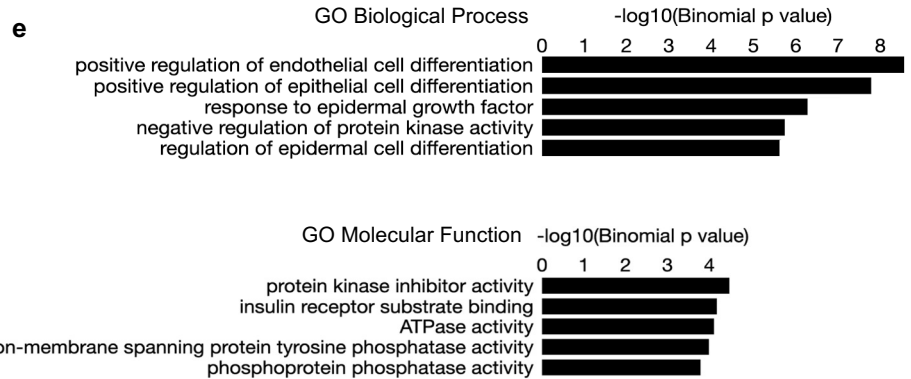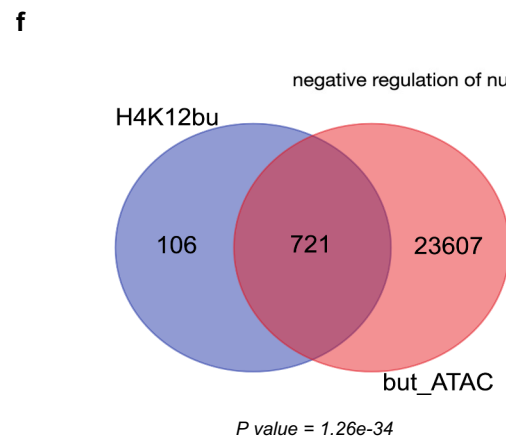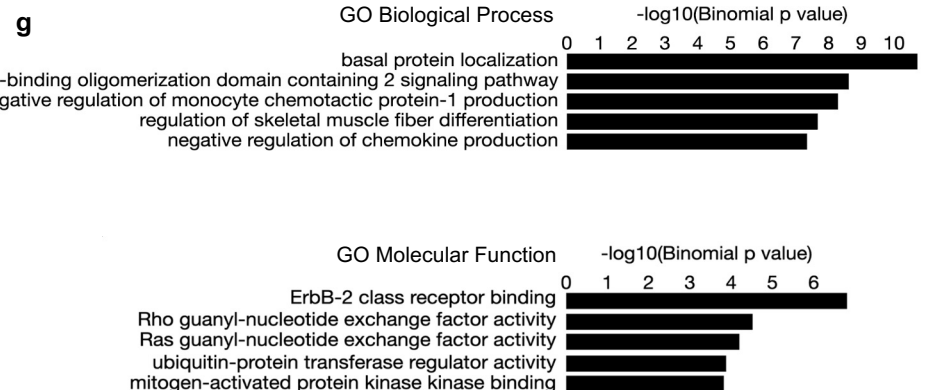

**Supplementary Fig. 10** | Propionyl and butyryl ATAC-seq and Kbu ChIP-seq and ATAC-seq integration. **a** Differential accessibility following propionate and butyrate supplementation. Sites identified as significantly differentially accessible are shown in red. n = 3 technical replicates for each condition. Differential accessibility was performed by DiffBind package with DESeq2 using a two-sided tests for both increased and decreased binding affinity between conditions followed by multiple hypothesis testing and FDR correction. **b** Top ten differentially bound regions associated with propionate and butyrate treatment sorted by false-discovery rate adjusted P value (FDR < 0.05) and top GO 'Biological Process' terms determined by GREAT against a whole genome background using a binomial test over genomic regions, followed by multiple hypothesis testing using FDR corrected P values (FDR < 0.05). **c** Normalized reads in accessible sites following propionate and butyrate treatment. Box plots display: The minimum, first quartile (Q1, 25<sup>th</sup> percentile), median, third quartile (Q3, 75<sup>th</sup> percentile), and maximum. The bottom of the box is Q1 and the top of the box is Q3. The line within the box represents the median (50<sup>th</sup> percentile) value. The whiskers extend to the most extreme data points within 1.5 times the IQR (interquartile range). **d, f** Overlap between Kbu bound genes and differentially accessible regions following 1 mM butyrate treatment. Significance of overlap determined by hypergeometric test-generated P value. **e, g** GO 'Biological Process' and 'Molecular Function' pathway terms associated with Kbu bound genomic coordinates that are also present in ATAC-seq data set sorted by binomial P value.
